# Supplementary material for: Folic acid-conjugated carbon dots as green fluorescent probes based on cellular targeting imaging for recognizing cancer cells
Source: Royal Society of Chemistry journal article supplement (doi:10.1039/c7ra07002k), 2017-01-01
Supplement: c7ra07002k1.pdf [file c7ra07002k1.pdf]

## Electronic Supplementary Information

### Folic acid conjugated carbon dots as green fluorescent probe based on cellular targeting imaging for recognizing cancer cells

Xuewei Zhao<sup>a</sup>, Junli Zhang<sup>a</sup>, Lihong Shi<sup>a</sup>, Ming Xian<sup>b</sup>, Chuan Dong<sup>a</sup> and Shaomin Shuang<sup>\*a</sup>

<sup>a</sup> Department of Chemistry and Chemical Engineering, Center of Environment Science and Engineering Research, Shanxi University, Taiyuan, 030006, China. E-mail: [smshuang@sxu.edu.cn](mailto:smshuang@sxu.edu.cn); Fax: +86-0351-7011688; Tel: +86-0351-7018842

<sup>b</sup> Department of Chemistry, Washington State University, Pullman, WA, 99164, USA.

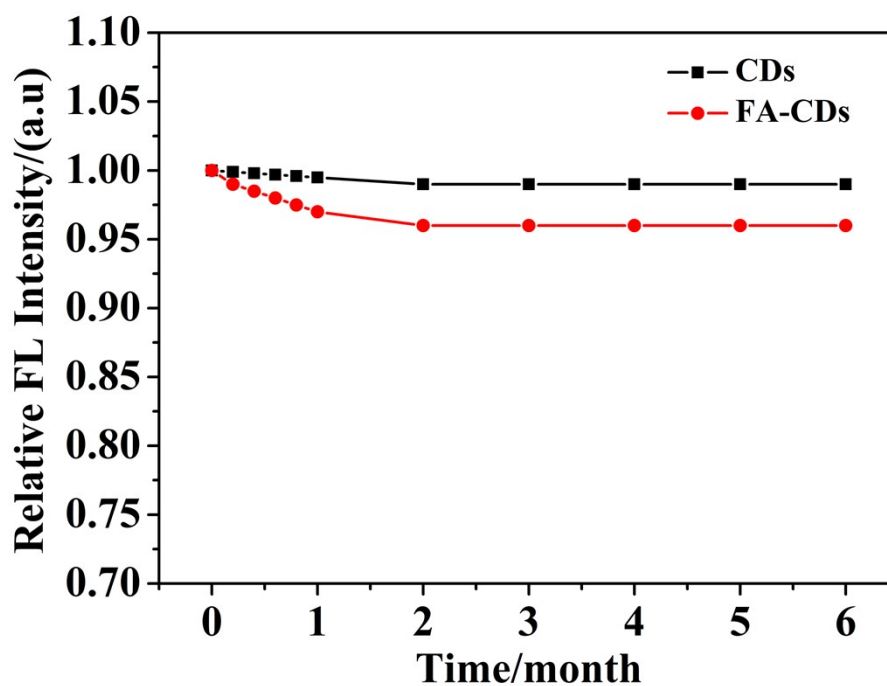

Fig. S1 The photostability of CDs and FA-CDs when stored at 4 °C respectively.

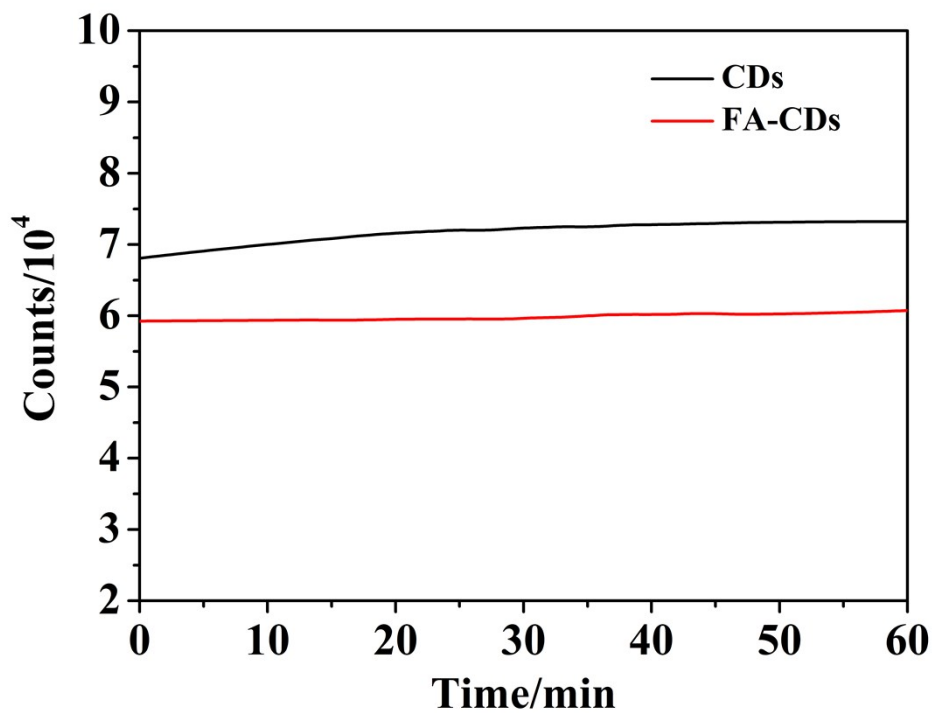

Fig. S2 Effect of time under illumination on the PL intensity of CDs and FA-CDs.

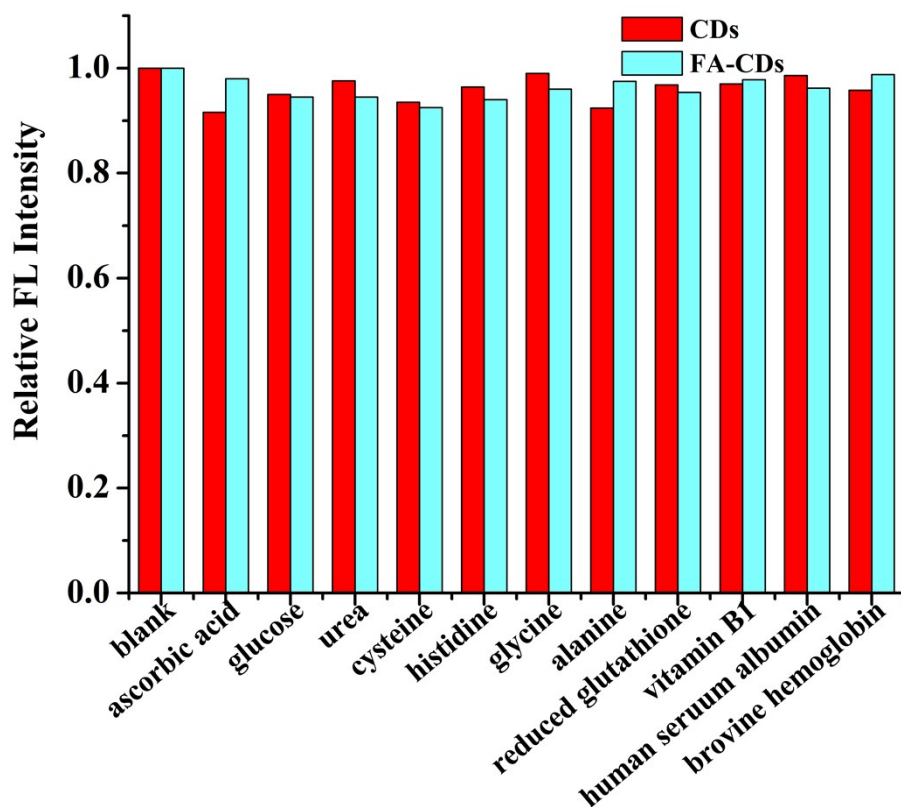

Fig. S3 Effects of common cellular substances on the fluorescence of CDs and FA-CDs, respectively.  $\lambda_{ex/em} = 396/512$  nm.

**Table S1** Comparison of the performance of folic acid conjugated-fluorescent CDs for recognizing cancer cells

| Precursor           | Surface modification | Method   |              |                           | Emission fluorescence | Quantum yield (%) | Ref.      |
|---------------------|----------------------|----------|--------------|---------------------------|-----------------------|-------------------|-----------|
|                     |                      | CDs      |              | FA-CDs                    |                       |                   |           |
| Glucose             | TTDDA                | Two-step | Microwave    | Dehydration coupling      | Green                 | 2                 | 1         |
| Glucose             | PAAS                 | One-pot  | Microwave    | Hydrogen                  | Green                 | 5.4               | 2         |
| ATP                 | PEI                  | Two-step | Hydrothermal | Electrostatic interaction | Blue                  | --                | 3         |
| Carbon fiber powder | PEI                  | Two-step | Ultrasonic   | Dehydration coupling      | Green                 | --                | 4         |
| Ammonium citrate    | --                   | One-pot  | Pyrolysis    | Dehydration coupling      | Blue                  | 9                 | 5         |
| Dandelion           | EDA                  | One-pot  | Hydrothermal | Dehydration coupling      | Green                 | 13.9              | This work |

**Table S2** Comparison with other kinds of carbon dots reported previously about stability and cell imaging. (% represents PL variation value of CDs)

| Precursor             | Method       | Photostability   |                           |                        | Cell imaging                                   | Ref.      |
|-----------------------|--------------|------------------|---------------------------|------------------------|------------------------------------------------|-----------|
|                       |              | Storage (4 °C)   | Photobleaching resistance | Substance interference |                                                |           |
| Citric acid EDA       | Hydrothermal | --               | Photobleaching            | > 20 %                 | No                                             | 6         |
| Glucose glutathione   | Hydrothermal | > 10 % (1-month) | < 10 %                    | > 10 %                 | No                                             | 7         |
| Milk                  | Hydrothermal | > 10 % (6-month) | Little change             | --                     | U87 cells imaging                              | 8         |
| Citric acid PEI       | Hydrothermal | < 5 %            | --                        | > 10 %                 | CAL-27 cells imaging                           | 9         |
| 1,2,4-triaminobenzene | Solvothermal | < 1 % (6-month)  | Little change             | --                     | Biolabeling MCF-7 cells                        | 10        |
| Dandelion EDA         | Hydrothermal | < 1 % (6-month)  | < 5 %                     | < 10 %                 | Targeting HepG-2 and MCF-7 cancer cell imaging | This work |

## References

1. Y. Song, W. Shi, W. Chen, X. Li and H. Ma, *Journal of Materials Chemistry*, 2012, **22**, 12568-12573.
2. Q. Liu, S. Xu, C. Niu, M. Li, D. He, Z. Lu, L. Ma, N. Na, F. Huang, H. Jiang and J. Ouyang, *Biosensors and Bioelectronics*, 2015, **64**, 119-125.
3. D. Lei, W. Yang, Y. Gong, J. Jing, H. Nie, B. Yu and X. Zhang, *Sensors and Actuators B: Chemical*, 2016, **230**, 714-720.
4. S. Aiyer, R. Prasad, M. Kumar, K. Nirvikar, B. Jain and O. S. Kushwaha, *Applied Materials Today*, 2016, **4**, 71-77.
5. I. P. J. Lai, S. G. Harroun, S. Y. Chen, B. Unnikrishnan, Y. J. Li and C. C. Huang, *Sensors and Actuators B: Chemical*, 2016, **228**, 465-470.
6. S. Zhu, Q. Meng, L. Wang, J. Zhang, Y. Song, H. Jin, K. Zhang, H. Sun, H. Wang and B. Yang, *Angewandte Chemie*, 2013, **125**, 4045-4049.
7. C. Wang, Z. Xu, H. Cheng, H. Lin, M. G. Humphrey and C. Zhang, *Carbon*, 2015, **82**, 87-95.
8. L. Wang and H. S. Zhou, *Analytical Chemistry*, 2014, **86**, 8902-8905.
9. C. Wang, Z. Xu and C. Zhang, *ChemNanoMat*, 2015, **1**, 122-127.
10. K. Jiang, S. Sun, L. Zhang, Y. Wang, C. Cai and H. Lin, *ACS Applied Materials & Interfaces*, 2015, **7**, 23231-23238.
